# Device therapy and hospital reimbursement practices across European countries: a heterogeneous scenario

Giuseppe Boriani<sup>1\*</sup>, Haran Burri<sup>2</sup>, Lorenzo G. Mantovani<sup>3</sup>, Nikos Maniadakis<sup>4</sup>, Francisco Leyva<sup>5</sup>, Joseph Kautzner<sup>6</sup>, Andrzej Lubinski<sup>7</sup>, Frieder Braunschweig<sup>8</sup>, Werner Jung<sup>9</sup>, Ignacio F. Lozano<sup>10</sup>, and Giovanni Fattore<sup>11</sup>

<sup>1</sup>Institute of Cardiology, University of Bologna, Via Massarenti 9, 40138 Bologna, Italy; <sup>2</sup>Cardiology Service, University Hospital of Geneva, Geneva, Switzerland; <sup>3</sup>Faculty of Pharmacy, CIRFF/Center of Pharmacoeconomics, University of Naples Federico II, Naples, Italy; <sup>4</sup>Department of Health Services Management, National School of Public Health, Athens, Greece; <sup>5</sup>Centre for Cardiovascular Sciences, Queen Elizabeth Hospital, University of Birmingham, Birmingham, UK; <sup>6</sup>Department of Cardiology, Institute for Clinical and Experimental Medicine, Prague, Czech Republic; <sup>7</sup>Department of Interventional Cardiology, Medical University of Lodz, Lodz, Poland; <sup>8</sup>Department of Cardiology, Karolinska Institutet, Karolinska University Hospital, Stockholm, Sweden; <sup>9</sup>Schwarzwald-Baar Klinikum, Academic Hospital of the University of Freiburg, Freiburg, Germany; <sup>10</sup>Unidad de Arritmias, Hospital Universitario Puerta de Hierro, Madrid, Spain; and <sup>11</sup>CERGAS, Bocconi University, Milan, Italy

As in other settings, in the field of clinical use of cardiac implantable electrical devices (CIEDs), the implementation, in various ways, of diagnosis-related groups (DRGs) has created new scenarios in most European healthcare systems. A DRG system is primarily a financial tool with the aim of promoting efficiency and improving utilization of resources. However, there are a variety of ways in which this system is used for funding the activity of centres implanting CIEDs. It is possible that the specific type and method of reimbursement may influence the implementation of CIEDs in the 'real world' through a variable spectrum of practices. These may range from the situation where reimbursement may, together with other factors, constitute a true barrier to the implementation of guidelines, to scenarios where reimbursement is adequate, and/or to situations where reimbursement may be adequate for standard devices but not for prompt implementation of effective technological innovations. The variety in reimbursement also affects how in-office checks of CIEDs are covered and, above all, the possibility to pay for remote follow-up of CIEDs. In the field of medical devices, refinement of DRG systems and adoption of new strategies and policies are needed to sustain and enhance those effective technological innovations that may be beneficial for specific patient populations. It is also important that physicians are deeply involved in the development and deployment of DRGs, and that each country DRGs agency has a transparent approach to engagement with stakeholders, along with robust and transparent mechanisms for updating these systems.

**Keywords** Cardiac resynchronization therapy • Diagnosis-related groups • Implantable cardioverter defibrillator • Pacemaker • Reimbursement

## Introduction

On the basis of evidence derived from randomized clinical trials, specific recommendations regarding treatment with a cardiac implantable electrical device (CIED) are available in international consensus guidelines.<sup>1,2</sup> However, the implementation of device therapy in clinical practice is largely incomplete and growing interest is dedicated to analysis of all the multiple factors that may modulate the access to therapy in appropriately selected patients.<sup>3–5</sup>

The various factors that may affect the implant rate of CIEDs include lack or inadequate implementation of specific guidelines, lack of screening programmes and imperfect referral pathways,

limited number of cardiac catheterization laboratories or implanting physicians, as well as the specific type of device analysed. In addition, the population demographic structure, socio-economic status, ethnic status, patient's cultural status, and patient's culture may have an influence on actual CIEDs implantation rates.<sup>3,6</sup> In this complex scenario, it is likely that also the variability in reimbursement practices for CIED and for specific types of CIEDs may have an impact in conditioning or modulating the use of device therapy or other invasive procedures in different organizational or socio-political contexts.<sup>3,7–10</sup> Moreover, the above factors may also impact on the availability of invasive or non-invasive diagnostic procedures used to establish a diagnosis that is associated with the indication for a CIED implant.

\* Corresponding author. Tel: +39 051 349858; fax: +39 051 344859, Email: giuseppe.boriani@unibo.it

Published on behalf of the European Society of Cardiology. All rights reserved. © The Author 2011. For permissions please email: journals.permissions@oup.com.

The aim of the present study is to provide a general overview of the diverse patterns of reimbursement practices in a sample of European countries, with specific focus on reimbursement for CIEDs.

## Funding in healthcare

European healthcare systems present a variety of financial and institutional arrangements, often reflecting domestic pathways. Hospital financing is no exception as different methods have been used with global budgets, activity-based financing (diagnosis-related group, DRG-like systems) being the most popular nowadays. In addition, the methods for remuneration of physicians are also variable, including both wages and remuneration with fee for service, sometimes combined.<sup>8</sup> It is beyond the scope of this article to enter the complex field of healthcare financing, but the variability existing in healthcare financing across Europe should be taken into account when reimbursement practices for specific hospital activities involving use of electrical devices are analysed.

## Diagnosis-related groups

The evolution of medicine and the increase in complexity of procedures performed in hospitals in the last decades have prompted the creation of patient classification systems which, as a common basis, relate the characteristics of in-hospital-treated patients to the resources used. The methods used to classify patients across Europe were often derived from the Health Care Financing Administration system introduced in 1983 for the Medicare system in the USA. Initially developed as an information tool to monitor quality and use of services, patient classification systems later became prospective payment systems, named DRGs.<sup>9,11</sup> In recent years, new versions have been implemented which adjust for the severity of diagnosis and/or other co-morbidities: the Ms-DRG (Medicare-Severity DRGs) and Apr-DRG (All Patient Refined DRGs) systems. Today, the objective of DRG systems is to classify hospital cases into one of ~500–1000 groups, thus creating a patient classification system that relates the type of patients treated to the resources that they consume. These data are not only used as information for analysis—as a matter of fact, in most European countries a DRG system or similar grouping systems have been introduced as instruments for hospital reimbursement.<sup>9</sup>

The methods for paying hospitals for inpatient care have thus evolved over time from per diem or line-item budgets to global budgets and then again to case-based payment (mainly through variants of DRGs).<sup>8</sup> A wide variety of reasons may explain the introduction of DRGs in European countries: to control costs for care, to provide a clear payment system for both public and private hospitals, to stimulate competition among hospitals, and to reduce waiting times.<sup>12</sup> Hungary was one of the first European countries to introduce DRGs, beginning in 1987, with full implementation in 1993.<sup>8,9</sup>

Since the adoption of DRG systems, the link between financial and clinical aspects has become well established. From the clinical point of view, appropriate attention has to be paid to the application of a DRGs paradigm. Diagnosis-related groups, by definition, are 'groups or classes of patient episodes designated by codes or terms which describe to a greater or lesser degree of specificity

a diagnosis or a procedure'.<sup>11</sup> Assessment of the impact of DRGs in the countries of the European Union suggests that implementation of DRGs is associated with increased levels of hospital activity in the short term,<sup>13–15</sup> but may also result in cost shifting,<sup>16</sup> growth in readmission rates and 'up-coding' ('DRG creep'),<sup>11,14,17</sup> or cream-skimming.<sup>8</sup> These are the reasons for a series of periodic revisions to DRG systems in several countries. They also imply a need to monitor the quality of in-hospital care in tandem with the implementation of DRG-based reimbursement of hospitals.

In Table 1, we summarize the role of DRG systems for funding in-hospital care for 19 European countries. Specifically, we report in detail for each specific country whether the DRG system and its tariffs play a predominant role in funding (if the system covers at least 50% of total funding for inpatient providers), or whether, conversely, a DRG-related system exists but is used primarily for information purposes with limited or no role in financing. We also report if the original US DRG system is used, or if a different system has been developed. Since it is difficult to obtain up-to-date and accurate information on this topic, and in particular

**Table 1 Funding for in-hospital care in 19 European countries and role of diagnosis related group systems for funding hospital care, with regard to public and private hospitals, respectively**

| Country              | DRG system for public hospitals | DRG system for private hospitals | DRG system               |
|----------------------|---------------------------------|----------------------------------|--------------------------|
| Austria              | No                              | No                               | LDF                      |
| Belgium              | No                              | No                               | APR-DRG                  |
| Czech Republic       | Yes                             | Yes                              | ALFA-DRG                 |
| Denmark <sup>a</sup> | No                              | No                               | Dk-DRG                   |
| Finland <sup>a</sup> | No                              | No                               | NORD-DRG                 |
| France               | Yes                             | Yes                              | GHS                      |
| Germany              | Yes                             | Yes                              | G-DRG                    |
| Greece               | No                              | No                               | USA DRG                  |
| Hungary              | Yes                             | Yes                              | HBCS                     |
| Ireland              | No                              | No                               | Australian AR-DRG        |
| Italy <sup>a</sup>   | Yes, with budget caps           | Yes, with budget caps            | USA DRG                  |
| Netherlands          | Yes                             | Yes                              | DBC                      |
| Norway <sup>a</sup>  | No                              | No                               | NORD-DRG                 |
| Poland               | Yes                             | Yes                              | Procedure list           |
| Portugal             | Yes                             | Yes                              | USA DRG                  |
| Switzerland          | Yes                             | No (Yes as from 2012)            | AP-DRG; Swiss DRG (2012) |
| Spain                | No                              | Yes/No                           | USA AP-DRG v23.0         |
| Sweden <sup>a</sup>  | No                              | No                               | NORD-DRG                 |
| UK                   | Yes                             | Yes                              | HRG                      |

<sup>a</sup>Countries with a predominantly mixed system (diagnosis related groups and global budget).

on the one-dimensional use of DRGs for funding allocation versus multi-factorial funding allocation, the picture we present has to be considered in general terms.

## Reimbursement for implantable electrical devices across Europe

Indications for therapy with implantable devices for brady or tachyarrhythmias, sudden death prevention, cardiac resynchronization in heart failure, or for the purpose of arrhythmia monitoring are today well described and graded in terms of recommendation levels and scientific evidence, summarized in international consensus guidelines.<sup>1,2</sup> Furthermore, in most countries, national physician societies or health agencies have issued national guidelines, transferring evidence from the literature and international guidelines into the specific context of healthcare organization in their country. While international guideline recommendations typically focus on published scientific evidence and clinical expert judgement but pay less attention to cost-effectiveness aspects, more and more national guideline documents incorporate information on the cost effectiveness of treatments in the grading of recommendations for their clinical application (e.g. guidelines from the National Institute for Health and Clinical Excellence, UK, and Swedish Board of Health and Welfare).

However, while international and national European guidelines for device therapies come to similar conclusions, the rates of device implantation vary considerably from country to country<sup>4,18–22</sup> as well as from region to region,<sup>6,22</sup> for all the various types of CIEDs. While heterogeneity in implant rates has been a subject of evaluation and investigation,<sup>6,18,19</sup> limited attention has been dedicated to heterogeneity in reimbursement mechanisms across the various European countries. In *Table 2*, we report a summary of the predominant reimbursement methods in specific European countries for CIEDs, with regard to both implantable pulse generators (IPGs) and implantable cardioverter defibrillators (ICDs). The complexity of European healthcare systems is enhanced in most countries by variations in reimbursement practices between public and private hospitals, or between payers, as well as by variations according to geographic regions (e.g. in Italy) or hospital type.<sup>23</sup>

*Table 3* shows specific data on the actual state of reimbursement in various European countries, including indications on the specificity of the DRG tariff for the type of CIED (single-chamber, dual-chamber, or biventricular device) and on inclusion of the cost for device purchase in the DRG tariff. As shown, the scenario of reimbursement for electrical devices confirms a substantial variability, with some countries not differentiating the tariff for reimbursement according to the type of implanted device.

## Reimbursement for in-clinic device check and for remote monitoring of implantable electrical devices

All CIEDs require periodic checks, as indicated by the recent Heart Rhythm Society/European Heart Rhythm Association (EHRA)

Expert consensus document.<sup>24</sup> The in-office device check is included in the list of reimbursed outpatient services in almost all European countries; usually it is coded and reimbursed using specific tariffs that include control and reprogramming. A substantial variability between the countries is present in this case too, since some countries have specific codes for single or dual chamber and others use a single code for all types of CIEDs, as reported in *Table 4*.

Current technologies now allow for remote follow-up of CIEDs. This may represent a more efficient way of organizing CIEDs follow-up, by reducing the workload of routine follow-up visits. As shown in *Table 5*, there is a substantial variability across Europe with regard to reimbursement of remote CIEDs follow-up, with definition of specific tariffs only in a few countries. Healthcare payers may be reluctant to reimburse remote device management due to lack of robust economic analysis and evidence of improved patient outcome, despite acknowledging the strategy to be safe.<sup>25</sup> In the USA, Medicare and Medicaid have expanded reimbursement for remote device monitoring for all states since 2006. Reimbursement rates may vary from state to state, and are in some instances the same as an in-office visit without device programming.

In patients with heart failure, some devices provide dedicated diagnostic features for the monitoring of fluid retention and disease state, aiming to improve the maintenance of stable compensation. These features open the perspective of remote disease management by CIEDs.<sup>26</sup> The possibility to establish a specific reimbursement for disease management of heart failure patients by remote monitoring should be the subject of

**Table 2 Models existing across Europe for reimbursement to healthcare providers of implantable pulse generators and implantable cardioverter defibrillators**

| Case payment (DRGs) predominant | Mixed model (DRGs a component in some) | Reimbursement list (DRGs may co-exist)                                                        |
|---------------------------------|----------------------------------------|-----------------------------------------------------------------------------------------------|
| Germany                         | Austria                                | Belgium                                                                                       |
| Hungary                         | Czech Republic                         | Czech Republic<br>(reimbursement list for highly innovative product in centres of excellence) |
| Italy (on a regional basis)     | Denmark                                | France                                                                                        |
| Netherlands                     | Finland                                |                                                                                               |
| Poland                          | Greece                                 |                                                                                               |
| Portugal                        | Hungary                                |                                                                                               |
| Switzerland                     | Ireland                                |                                                                                               |
| UK                              | Italy (on a regional basis)            |                                                                                               |
|                                 | Norway                                 |                                                                                               |
|                                 | Sweden                                 |                                                                                               |
|                                 | Spain                                  |                                                                                               |

**Table 3** Methods for reimbursement of implantable pulse generators and implantable cardioverter defibrillators to healthcare providers across Europe

| Country        | Reimbursement system                         | IPGs                         |                                           | ICDs                        |                                           |
|----------------|----------------------------------------------|------------------------------|-------------------------------------------|-----------------------------|-------------------------------------------|
|                |                                              | Specificity for device type  | Inclusion of the device in the DRG tariff | Specificity for device type | Inclusion of the device in the DRG tariff |
| Austria        | LKF (AU ver. of DRG)                         | SC, DC, CRT-P                | Yes                                       | All ICD, CRT-D              | Yes                                       |
| Belgium        | List price (only device)                     | SC, DC, CRT-P <sup>a,b</sup> | No                                        | SC, DC, CRT-D <sup>b</sup>  | No                                        |
| Czech Republic | Specific tariff available for each procedure | SC, DC, CRT-P                | No                                        | SC, DC, CRT-D               | No                                        |
| Denmark        | Global budget + NORD-DRG                     | No                           | Yes                                       | No                          | Yes                                       |
| Finland        | Global budget + NORD-DRG                     | No                           | Yes                                       | All ICD, CRT-D              | Yes                                       |
| France         | List price (only device)                     | SC, DC, CRT-P <sup>b</sup>   | No                                        | SC, DC, CRT-D <sup>b</sup>  | No                                        |
| Germany        | DRG                                          | SC, DC                       | Yes                                       | SC, DC, CRT-D               | Yes                                       |
| Greece         | Global budget                                | n/a                          | n/a                                       | n/a                         | n/a                                       |
| Hungary        | DRG                                          | No                           | No                                        | No                          | No                                        |
| Ireland        | Global budget + DRG                          | No                           | n/a                                       | No                          | n/a                                       |
| Italy          | Global budget + DRG                          | No                           | Yes                                       | No                          | Yes                                       |
| Netherlands    | Global budget + DRG                          | No                           | No                                        | No                          | Yes                                       |
| Norway         | Global budget + NORD-DRG                     | No                           | Yes                                       | All ICD, CRT-D              | Yes                                       |
| Poland         | DRG (procedure list)                         | SC, DC                       | Yes                                       | No                          | Yes                                       |
| Portugal       | DRG                                          | No                           | Yes                                       | No                          | Yes                                       |
| Switzerland    | AP-DRG; Swiss-DRG from 2012                  | SC, DC, CRT-P                | Yes                                       | SC, DC, CRT-D               | Yes                                       |
| Spain          | Global budget                                | No                           | No                                        | No                          | No                                        |
| Sweden         | Global budget + NORD-DRG                     | No                           | Yes                                       | All ICD, CRT-D              | Yes                                       |
| UK             | DRG                                          | SC, DC, CRT-P                | Yes                                       | No                          | No                                        |

SC, single-chamber; DC, dual-chamber; n/a, not available.

<sup>a</sup>Third lead not reimbursed.

<sup>b</sup>Leads reimbursed on top of the device.

investigations considering that this activity may have an impact on chronic outpatient care.

## Reimbursement practices and funding of innovation

Since patients are usually not able to directly cover the expenses for their healthcare, coverage, and reimbursement practices are crucial in conditioning the way that new medical technologies are used in daily practice.<sup>27</sup> In many countries, it is not well defined how and how often updating of DRG tariffs will occur. This is relevant with regard to implementation of innovative devices or device features. When an innovative device/procedure becomes available, generally at an increased price for purchasing, the application of current DRG codes and tariffs to new more expensive devices may be problematic or may fail, despite formal approval of the new device, for purely financial reasons.<sup>28</sup> As a consequence, different reimbursement mechanisms can result either in acceleration or in slowing of the adoption and

implementation of innovative and more expensive technologies. In such a situation, the decisions on how to identify new technologies, devices, or procedures that are subject to coverage and reimbursement strongly influence clinical practice and profoundly influence the scenario that supports medical innovation, creating either incentives or disincentives for manufacturers to propose innovations. In fields with rapid technological evolution, it is important to adapt reimbursement practices to innovative, more sophisticated technological advancements, thus allowing implementation of these innovations in clinical practice as soon as evidence of benefit is available.<sup>10,27</sup> At the same, it is essential that any innovation is adequately evaluated in terms of net clinic benefits and cost effectiveness. In the absence of any facilitation or adaptation of the system, the implementation of innovative medical technologies with a higher price in comparison with the currently used technology remains a challenge. If the extra costs are not reimbursed, hospitals will not find any incentive to adopt a new technology, except for marketing reasons or for research purposes, and the unadapted DRG systems might result in slowing down technological innovation.

Alternative options to support innovation may include separate or additional budgets for funding innovation. Some countries with DRG funding have channels to support the introduction of

innovative, more expensive technologies. These solutions include the activity supported by Neue Untersuchungs- und Behandlungsmethoden in Germany, Integrated Care contracts in Germany, special funds dedicated to financing innovative and expensive technologies in France, regional initiatives in Italy, etc. However, these processes may not be well understood by stakeholders and implementation of technology may have some limitations. We feel that lack of a systematic approach in this field opens up space for discussion in the European Commission on the most effective ways for promotion of novel technologies, including specific incentive programmes.

For CIEDs, accumulation of clinical evidence requires a relatively long time period. Therefore, one option for coverage of promising technological innovations, including devices, that would not otherwise meet full standards of available evidence is ‘coverage with evidence development’ — a policy proposed in the USA by Medicare in 2005.<sup>29</sup> This policy is targeted at diminishing the logjam between innovation and evidence-based medical policy, allowing a formal option for coverage of promising technologies that includes collection of longitudinal data for a better understanding of the risks, benefits, and costs of the new treatment options.<sup>29,30</sup>

**Table 4 Reimbursement for in-office follow-up of implanted electrical devices**

| Country        | IPG    |      | ICD    |      | CRT |
|----------------|--------|------|--------|------|-----|
|                | Single | Dual | Single | Dual |     |
| Belgium        | x      | x    |        | x    | n/a |
| Czech Republic | x      | x    |        | x    |     |
| Denmark        |        |      | x      |      |     |
| Finland        | x      | x    |        | x    | n/a |
| France         |        | x    |        | x    | n/a |
| Germany        |        |      | x      |      |     |
| Italy          |        |      | x      |      |     |
| Netherlands    | x      |      |        | x    | n/a |
| Norway         |        |      | x      |      |     |
| Portugal       |        | x    |        | x    | x   |
| Spain          |        |      | x      |      |     |
| Sweden         |        | x    |        | x    | x   |
| Switzerland    | x      | x    | x      | x    | n/a |
| UK             |        |      | x      |      |     |

The presence of specific reimbursement according to the characteristics of the implanted device or the lack of specific reimbursement are indicated. x, availability of reimbursement.

### Conclusions

As in other settings, also in the field of clinical use of CIEDs, the implementation, in various ways, of DRGs has created a new scenario in most healthcare systems in Europe. Diagnosis-related group systems are primarily financial tools that also have the aim of promoting efficiency and improving the use of resources. However, there are a variety of ways in which DRG systems are used for funding the activity of centres implanting CIEDs, particularly with regard to how specific types of devices are reimbursed.

**Table 5 Reimbursement of in-clinic device check and current availability of tariffs for reimbursement to hospitals of remote device check across Europe**

|                | Availability of a tariff for reimbursement of in-clinic device check | Availability of a tariff for reimbursement of remote device check | Availability of a tariff for procurement of hardware and service for remote device check |
|----------------|----------------------------------------------------------------------|-------------------------------------------------------------------|------------------------------------------------------------------------------------------|
| Belgium        | x                                                                    | No                                                                | No                                                                                       |
| Czech Republic | x                                                                    | No                                                                | No                                                                                       |
| Denmark        | x                                                                    | No                                                                | No                                                                                       |
| Finland        | x                                                                    | No                                                                | No                                                                                       |
| France         | x                                                                    | No                                                                | Price premium on selected systems                                                        |
| Germany        | x                                                                    | x                                                                 | No                                                                                       |
| Italy          | x                                                                    | No                                                                | No                                                                                       |
| Netherlands    | x                                                                    | No                                                                | No                                                                                       |
| Norway         | x                                                                    | No                                                                | No                                                                                       |
| Portugal       | x                                                                    | x                                                                 | No                                                                                       |
| Spain          | n/a                                                                  | n/a                                                               | No                                                                                       |
| Sweden         | x                                                                    | x                                                                 | No                                                                                       |
| Switzerland    | x                                                                    | No                                                                | No                                                                                       |
| UK             | x                                                                    | No                                                                | No                                                                                       |

x, availability of reimbursement.



The variability of reimbursement across Europe has to be taken into account when trying to interpret the effective implementation in specific regional or national contexts of consensus guidelines on indications to implant specific types of CIEDs. It is likely that the specific type and method of reimbursement may influence the implementation of device therapy in daily 'real-world practice' through a variable spectrum of effects, often poorly understood and sometimes undesirable. These influences may range from the situation where reimbursement may, in combination with other factors, constitute a true barrier to widespread implementation of consensus guidelines, to situations where reimbursement appears to be adequate and, finally, to situations where reimbursement may be adequate for most standard devices but is not fully adequate to allow prompt implementation of effective technological innovations.

The heterogeneity in reimbursement systems between European countries also affects how in-office check of CIEDs is covered and, above all, the possibility to pay for remote follow-up of CIEDs. Despite the potential for improving the efficiency of device clinics, remote device checks are currently reimbursed only in a minority of countries.

In the field of medical devices, refinement of DRG systems and adoption of new strategies and policies are needed to sustain and enhance those effective technological innovations that may be beneficial for specific patient populations, allowing an improvement in patients' outcome and quality of life, with an affordable absorption of economic resources. It is important that physicians are deeply involved in the development and deployment of DRGs, and that each country DRG agency has a transparent approach to planning, communication, and engagement with stakeholders, along with robust and transparent prioritization mechanisms for updating codes and tariffs. Data quality assessment is also essential for DRG systems. For this reason, it is imperative to ensure a high degree of accuracy and compliance in clinical coding (diagnosis, co-morbidity, and procedure) and also in cost measurement and allocation. Necessarily, this requires strong efforts including investments in education and in database systems.

## Acknowledgements

The authors thank Rachele Busca and Ben Brown, from Medtronic International, Tolochenaz, (Switzerland), for their help in data collection.

**Conflict of interest:** H.B. Consulting fees/honoraria from Medtronic, Boston Scientific, Biotronik, and Sorin. Research grants from Medtronic, Boston Scientific, Biotronik, Sorin, and St Jude Medical. F.L. Consulting fees/honoraria from Medtronic, St Jude Medical, and Sorin. Research grants from Medtronic, St Jude Medical, and Sorin. J.K. Consulting fees/honoraria from Biotronik, Boston Scientific, Medtronic, St Jude Medical. F.B. Consulting fees/honoraria from Medtronic, Biotronik, Sorin, and Boston Scientific. Research grants from Medtronic. W.J. Consulting fees/honoraria from Biotronik, St Jude Medical, Medtronic, Boston Scientific, and Hansen Medical. I.F.L. Consulting fees/honoraria from Boston Scientific and St Jude Medical.

## References

- Vardas PE, Auricchio A, Blanc JJ, Daubert JC, Drexler H, Ector H et al. Guidelines for cardiac pacing and cardiac resynchronization therapy. The Task Force for Cardiac Pacing and Cardiac Resynchronization Therapy of the European Society of Cardiology. *Europace* 2007;**9**:959–98.
- Epstein AE, DiMarco JP, Ellenbogen KA, Estes NA 3rd, Freedman RA, Gettes LS et al. ACC/AHA/HRS 2008 Guidelines for Device-Based Therapy of Cardiac Rhythm Abnormalities: a report of the American College of Cardiology/American Heart Association Task Force on Practice Guidelines. *J Am Coll Cardiol* 2008;**51**: e1–62.
- Al-Khatib SM, Sanders GD, Carlson M, Cicic A, Curtis A, Fonarow GC et al. Preventing tomorrow's sudden cardiac death today: dissemination of effective therapies for sudden cardiac death prevention. *Am Heart J* 2008;**156**:613–2.
- Boriani G, Ricci R, Toselli T, Ferrari R, Branzi A, Santini M. Implantable cardioverter defibrillators: from evidence of trials to clinical practice. *Eur Heart J Suppl* 2007;**9**:i66–73.
- Rossenbacker T, Priori S, Zipes DP. The fight against sudden cardiac death: consensus guidelines as a reference. *Eur Heart J Suppl* 2007;**9**(Suppl.1):i50–8.
- Boriani G, Berti E, Biffi M, Marino M, Sassone B, Villani GQ et al. Implantable electrical devices for prevention of sudden cardiac death: data on implant rates from a 'real world' regional registry. *Europace* 2010;**12**:1224–30.
- Lau CP, Tse HF, Mond HG. The impact of reimbursement on the usage of pacemakers, implantable cardioverter defibrillators and radiofrequency ablation. *J Interv Card Electrophysiol* 2006;**17**:177–81.
- Thomson S, Foubister T, Mossialos E. Financing Health Care in the European Union. Challenges and Policy Responses. World Health Organization 2009, on behalf of the European Observatory on Health Systems and Policies. Accessed on November 10, 2010 at [www.euro.who.int/\\_data/assets/pdf\\_file](http://www.euro.who.int/_data/assets/pdf_file)
- Schreyögg J, Stargardt T, Tiemann O, Busse R. Methods to determine reimbursement rates for diagnosis related groups (DRG): a comparison of nine European countries. *Health Care Manag Sci* 2006;**9**:215–23.
- Schreyögg J, Bäumler M, Busse R. Balancing adoption and affordability of medical devices in Europe. *Health Policy* 2009;**92**:218–24.
- Goldfield N. The evolution of diagnosis-related groups (DRGs): from its beginnings in case-mix and resource use theory, to its implementation for payment and now for its current utilization for quality within and outside the hospital. *Qual Manag Health Care* 2010;**19**:3–16.
- Ettelt S, Thomson S, Nolte E, Mays N. Reimbursing highly specialised hospital services: the experience of activity-based funding in eight countries. A report commissioned by the Department of Health and prepared by the London School of Hygiene and Tropical Medicine. 2006. Accessed on November 10, 2010 at [www.lshtm.ac.uk/publications/list.php](http://www.lshtm.ac.uk/publications/list.php)
- Dismuke CE, Sena V. Has DRG payment influenced the technical efficiency and productivity of diagnostic technologies in Portuguese public hospitals? An empirical analysis using parametric and non-parametric methods. *Health Care Manag Sci* 1999;**2**:107–116.
- Louis DZ, Yuen EJ, Braga M, Cicchetti A, Rabinowitz C, Laine C. Impact of a DRG-based hospital financing system on quality and outcomes of care in Italy. *Health Serv Res* 1999;**34**:405–15.
- Mikkola H, Keskimäki I, Hakkinen U. DRG-related prices applied in a public health care system – can Finland learn from Norway and Sweden? *Health Policy* 2001;**59**: 37–51.
- Jönsson B. Cost sharing for pharmaceuticals – the Swedish reimbursement system. *Pharmacoeconomics* 1996;**10**(Suppl. 2):68–74.
- Rogers R, Williams S, Jarman B, Aylin P. HRG drift and payment by results. *BMJ* 2005;**330**:563–4.
- Dickstein K, Bogale N, Priori S, Auricchio A, Cleland JG, Gitt A et al. The European cardiac resynchronization therapy survey. *Eur Heart J* 2009;**30**:2450–60.
- Merkely B, Roka A, Kutya V, Boersma L, Leenhardt A, Lubinski A et al. Tracing the European course of cardiac resynchronization therapy from 2006 to 2008. *Europace* 2010;**12**:692–701.
- Vardas P, Auricchio A, Wolpert C. The EHRA White Book 2010. The Current Status of Cardiac Electrophysiology in ESC Member Countries. Accessed on November 10, 2020 at [www.escardio.org/communities/EHRA/publications/Documents/ehra-white-book-2010.pdf](http://www.escardio.org/communities/EHRA/publications/Documents/ehra-white-book-2010.pdf)
- Wolpert C, Lubinski A, Bissinger A, Merkely B, Priori S, Brugada J. Barriers to implementation of evidence-based electrical therapies and the need for outcome research: role of European registries. *Europace* 2011;**13**(suppl. 2): ii18–20.
- Camm AJ, Nisam S. European utilization of the implantable defibrillator: has 10 years changed the 'enigma'? *Europace* 2010;**12**:1063–9.
- Cappellaro G, Fattore G, Torbica A. Funding health technologies in decentralized systems: a comparison between Italy and Spain. *Health Policy* 2009;**92**:313–21.
- Wilkoff BL, Auricchio A, Brugada J, Cowie M, Ellenbogen KA, Gillis AM et al. HRS/EHRA expert consensus on the monitoring of cardiovascular implantable

- electronic devices (CIEDs): description of techniques, indications, personnel, frequency and ethical considerations. *Heart Rhythm* 2008;**5**:907–25.
25. Vinck I, Stroobandt S, Gerkens S, De Laet C. Remote monitoring for patients with implanted defibrillator. Technology evaluation and broader regulatory framework. Health Technology Assessment (HTA) and Health Services Research (HSR). Brussels: Belgian Health Care Knowledge Centre (KCE). 2010. KCE Reports 136C. D/2010/10.273/55.
  26. Boriani G, Diemberger I, Martignani C, Biffi M, Valzania C, Bertini M et al. Telecardiology and remote monitoring of implanted electrical devices: the potential for fresh clinical care perspectives. *J Gen Intern Med* 2008;**23**(Suppl. 1): 73–7.
  27. Boriani G, Maniadakis N, Auricchio A, Vardas P. Health economics and outcomes research: a new challenge and field of action for the European Heart Rhythm Association. *Europace* 2010;**12**:601–3.
  28. Rogowski WH, Hartz SC, John JH. Clearing up the hazy road from bench to bedside: a framework for integrating the fourth hurdle into translational medicine. *BMC Health Serv Res* 2008;**8**:194.
  29. Tunis SR, Pearson SD. Coverage options for promising technologies: Medicare's 'coverage with evidence development'. *Health Aff (Millwood)* 2006;**25**:1218–30.
  30. Reed SD, Shea AM, Schulman KA. Economic implications of potential changes to regulatory and reimbursement policies for medical devices. *J Gen Intern Med* 2008;**23**(Suppl. 1):50–6.
